# Supplementary material
Source: PubMed Central journal article supplement (PMC4204638)
Supplement: supp_gzu037_gzu037supp.pdf [file supp_gzu037_gzu037supp.pdf]

labels correspond to the four quadrants in (A) as follows:  $Q_{\alpha_R}$  labeled a,  $Q_{\beta}$  labeled b,  $Q_{\alpha_L}$  labeled p and  $Q_o$  labeled o.

**Table S1. Correlation coefficients (R) between initial and latter portions of the trajectories for the 64 conformational states populated by the three central residues.**

| <b>Guest X Residue</b> | <b>L-isomer</b> | <b>D-isomer</b> |
|------------------------|-----------------|-----------------|
| Ala-1                  | 0.94            | 0.89            |
| Ala-2                  | 0.98            | 0.93            |
| Ala-3                  | 0.93            | 0.95            |
| Arg-1                  | 0.92            | 0.93            |
| Arg-2                  | 0.95            | -               |
| Asp-1                  | 0.95            | 0.94            |
| Asp-2                  | 0.98            | -               |
| Ash                    | 0.91            | 0.96            |
| Asn-1                  | 0.92            | 0.92            |
| Asn-2                  | 0.96            | -               |
| Cys-1                  | 0.96            | 0.99            |
| Cys-2                  | 0.98            | -               |
| Gln-1                  | 0.92            | 0.94            |
| Gln-2                  | 0.75            | -               |
| Glu-1                  | 0.94            | 0.96            |
| Glu-2                  | 0.88            | -               |
| Glh                    | 0.88            | 0.90            |
| Gly-1                  |                 | 0.96            |
| Gly-2                  |                 | 0.97            |
| Gly-3                  |                 | 0.96            |
| Hid-1                  | 0.88            | 0.90            |
| Hid-2                  | 0.93            | -               |
| Hie                    | 0.93            | 0.95            |
| Hip                    | 0.86            | 0.92            |
| Ile-1                  | 0.93            | 0.99            |
| Ile-2                  | 0.88            | -               |
| allo-Ile               | -               | 0.91            |
| Leu-1                  | 0.98            | 0.90            |
| Leu-2                  | 0.91            | -               |
| Lys-1                  | 0.93            | 0.94            |
| Lys-2                  | 0.86            | -               |
| Met                    | 0.83            | 0.97            |
| Phe                    | 0.88            | 0.93            |
| Pro                    | 0.94            | 0.98            |
| Ser                    | 0.87            | 0.95            |
| Thr                    | 0.97            | 0.94            |
| allo-Thr               | -               | 0.93            |
| Trp                    | 0.91            | 0.97            |
| Tyr                    | 0.94            | 0.86            |
| Val                    | 0.90            | 0.91            |

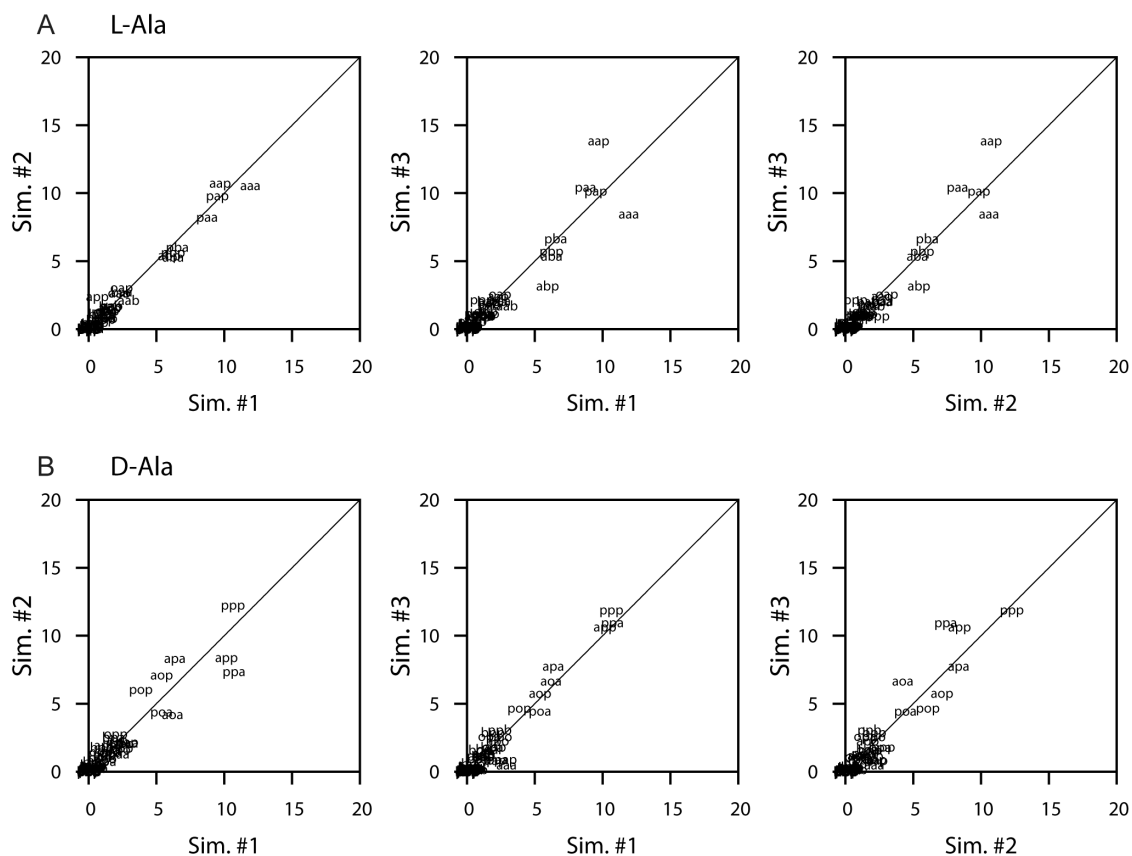

Figure S2. (A) Plots of conformational populations of the 64 states between simulations of L-Ala. (B) Plots of conformational population of the 64 states between simulations of D-Ala. Again, the datapoint labels correspond to one of the four quadrants shown in Fig. S1A as follows:  $Q_{\alpha_R}$  labeled a,  $Q_{\beta}$  labeled b,  $Q_{\alpha_L}$  labeled p and  $Q_o$  labeled o.

**Table S2. Correlation coefficients (R) between production trajectories from multiple simulations of the same central ‘guest’ residue.**

| <b>Guest X Residue</b> | <b>Simulation #1 vs. Simulation #2</b> | <b>Simulation #1 vs. Simulation #3</b> | <b>Simulation #2 vs. Simulation #3</b> |
|------------------------|----------------------------------------|----------------------------------------|----------------------------------------|
| L-Ala                  | 0.99                                   | 0.95                                   | 0.97                                   |
| D-Ala                  | 0.95                                   | 0.98                                   | 0.95                                   |
| L-Arg                  | 0.98                                   | -                                      | -                                      |
| L-Asp                  | 0.96                                   | -                                      | -                                      |
| L-Asn                  | 0.97                                   | -                                      | -                                      |
| L-Cys                  | 0.96                                   | -                                      | -                                      |
| L-Gln                  | 0.97                                   | -                                      | -                                      |
| L-Glu                  | 0.96                                   | -                                      | -                                      |
| Gly                    | 0.98                                   | 0.97                                   | 0.94                                   |
| L-Hid                  | 0.97                                   | -                                      | -                                      |
| L-Ile                  | 0.89                                   | -                                      | -                                      |
| L-Leu                  | 0.98                                   | -                                      | -                                      |
| L-Lys                  | 0.94                                   | -                                      | -                                      |

**Table S3. Population of the four quadrants of the Ramchandran plot**

| Guest 'X'<br>Residue | Population Frequency (%) |                |                 |                |                |                |                 |                |
|----------------------|--------------------------|----------------|-----------------|----------------|----------------|----------------|-----------------|----------------|
|                      | L-amino acids            |                |                 |                | D-amino acids  |                |                 |                |
|                      | Q <sub>α</sub>           | Q <sub>β</sub> | Q <sub>αL</sub> | Q <sub>o</sub> | Q <sub>α</sub> | Q <sub>β</sub> | Q <sub>αL</sub> | Q <sub>o</sub> |
| Ala-1                | 58.5                     | 35.5           | 5.6             | 0.4            | 14.0           | 0.5            | 55.0            | 30.5           |
| Ala-2                | 59.5                     | 32.9           | 7.1             | 0.5            | 11.9           | 0.5            | 54.5            | 33.1           |
| Ala-3                | 61.2                     | 30.5           | 8.0             | 0.4            | 5.3            | 0.3            | 61.3            | 33.0           |
| Arg                  | 65.7                     | 26.3           | 8.0             | 0.1            | 8.3            | 0.1            | 67.6            | 24.1           |
| Asn                  | 80.0                     | 18.0           | 1.9             | 0.1            | 4.7            | 0.1            | 79.7            | 15.5           |
| Asp                  | 76.4                     | 17.6           | 5.9             | 0.1            | 12.5           | 0.1            | 64.4            | 22.9           |
| Ash                  | 84.3                     | 12.0           | 3.5             | 0.3            | 11.0           | 0.2            | 71.6            | 17.2           |
| Cys                  | 67.7                     | 25.6           | 6.5             | 0.2            | 13.4           | 0.2            | 55.5            | 30.9           |
| Gln                  | 59.0                     | 26.0           | 14.8            | 0.2            | 7.1            | 0.1            | 64.4            | 28.4           |
| Glu                  | 62.6                     | 30.4           | 6.3             | 0.7            | 3.4            | 0.1            | 64.6            | 31.9           |
| Glh                  | 59.8                     | 27.7           | 12.5            | 0.1            | 6.1            | 0.1            | 68.8            | 25.0           |
| Gly                  | 43.0                     | 9.4            | 37.4            | 10.1           | -              | -              | -               | -              |
| Hid                  | 64.9                     | 25.7           | 9.3             | 0.1            | 12.0           | 0.2            | 63.2            | 24.5           |
| Hie                  | 68.6                     | 25.9           | 5.4             | 0.1            | 7.5            | 0.1            | 62.9            | 29.6           |
| Hip                  | 63.8                     | 29.7           | 6.4             | 0.1            | 0.1            | 0.0            | 66.4            | 33.4           |
| Ile                  | 54.8                     | 45.1           | 0.0             | 0.0            | 0.4            | 0.1            | 61.1            | 38.3           |
| allo-Ile             | -                        | -              | -               | -              | 0.9            | 0.0            | 65.2            | 33.8           |
| Leu                  | 70.7                     | 24.0           | 5.2             | 0.1            | 2.4            | 0.0            | 73.7            | 23.9           |
| Lys                  | 74.1                     | 21.1           | 4.6             | 0.1            | 4.2            | 0.0            | 71.3            | 24.4           |
| Met                  | 66.2                     | 22.6           | 11.1            | 0.1            | 1.5            | 0.0            | 69.31           | 29.19          |
| Phe                  | 71.0                     | 27.5           | 1.5             | 0.0            | 6.7            | 0.1            | 71.2            | 21.9           |
| Pro                  | 19.1                     | 80.9           | -               | -              | -              | -              | 6.8             | 93.2           |
| Ser                  | 54.2                     | 41.1           | 4.5             | 0.2            | 2.5            | 0.0            | 53.0            | 44.5           |
| Thr                  | 67.9                     | 30.4           | 1.7             | -              | 0.1            | -              | 74.7            | 25.1           |
| allo-Thr             | -                        | -              | -               | -              | 0.0            | -              | 53.3            | 46.7           |
| Trp                  | 72.3                     | 20.2           | 7.3             | 0.2            | 5.4            | 0.1            | 75.2            | 19.3           |
| Tyr                  | 63.8                     | 25.9           | 10.0            | 0.3            | 5.7            | 0.2            | 74.1            | 20.0           |
| Val                  | 56.4                     | 39.6           | 4.0             | -              | 0.3            | 0.0            | 47.8            | 51.9           |

**Table S4. Population of conformational regions by the L- and D-amino acids.**

| Guest 'X'<br>Residue | Population Frequency (%) |                    |            |            |                  |                 |       |               |                      |              |             |                   |                  |       |
|----------------------|--------------------------|--------------------|------------|------------|------------------|-----------------|-------|---------------|----------------------|--------------|-------------|-------------------|------------------|-------|
|                      | L-amino acids            |                    |            |            |                  |                 |       | D-amino acids |                      |              |             |                   |                  |       |
|                      | $\alpha_R$               | Near<br>$\alpha_R$ | $\alpha_L$ | nP $\beta$ | P <sub>III</sub> | P <sub>IR</sub> | Other | D $\alpha_R$  | Near<br>D $\alpha_R$ | D $\alpha_L$ | DnP $\beta$ | DP <sub>III</sub> | DP <sub>IR</sub> | Other |
| Ala-1                | 23.6                     | 26.2               | 4.4        | 10.9       | 9.1              | 6.4             | 19.4  | 22.4          | 24.9                 | 11.7         | 9.1         | 7.3               | 6.0              | 18.7  |
| Ala-2                | 23.5                     | 27.4               | 5.7        | 9.3        | 7.5              | 6.7             | 19.9  | 22.8          | 23.8                 | 9.9          | 9.2         | 8.9               | 5.9              | 19.6  |
| Ala-3                | 25.0                     | 27.6               | 6.6        | 8.5        | 7.4              | 5.9             | 19.0  | 24.7          | 28.3                 | 4.1          | 8.7         | 7.3               | 7.0              | 19.9  |
| Arg                  | 28.1                     | 29.8               | 7.1        | 8.3        | 9.1              | 3.0             | 14.5  | 29.5          | 30.2                 | 7.4          | 7.9         | 8.7               | 2.4              | 13.9  |
| Asn                  | 40.2                     | 34.6               | 1.6        | 7.6        | 4.7              | 2.6             | 8.5   | 39.7          | 34.9                 | 4.1          | 7.0         | 3.3               | 2.7              | 8.3   |
| Asp                  | 30.6                     | 42.2               | 5.5        | 2.4        | 0.2              | 4.9             | 14.2  | 26.0          | 35.4                 | 11.9         | 4.7         | 0.4               | 6.4              | 15.2  |
| Ash                  | 40.0                     | 39.6               | 3.1        | 5.4        | 1.8              | 2.4             | 7.7   | 36.9          | 31.1                 | 9.9          | 8.4         | 3.3               | 2.8              | 7.6   |
| Cys                  | 28.6                     | 33.3               | 5.8        | 8.5        | 7.0              | 3.8             | 12.9  | 22.6          | 26.3                 | 12.1         | 9.9         | 10.5              | 3.6              | 15.1  |
| Gln                  | 26.7                     | 25.5               | 13.5       | 8.6        | 9.1              | 2.8             | 13.8  | 28.9          | 28.0                 | 6.5          | 9.1         | 10.5              | 3.2              | 14.0  |
| Glu                  | 31.8                     | 23.7               | 5.8        | 10.0       | 11.6             | 2.8             | 14.4  | 33.1          | 24.6                 | 3.0          | 10.6        | 11.9              | 3.0              | 13.9  |
| Glh                  | 28.2                     | 24.8               | 11.3       | 9.4        | 9.1              | 3.6             | 13.6  | 26.9          | 33.9                 | 5.5          | 7.6         | 6.1               | 4.2              | 15.9  |
| Gly                  | 16.7                     | 5.5                | 9.8        | 3.4        | 3.3              | 1.5             | 59.9  | -             | -                    | -            | -           | -                 | -                | -     |
| Hid                  | 24.6                     | 33.1               | 8.1        | 9.2        | 7.2              | 3.6             | 14.1  | 24.9          | 31.8                 | 10.5         | 9.3         | 7.2               | 2.8              | 13.5  |
| Hie                  | 30.9                     | 30.4               | 4.7        | 8.2        | 10.7             | 1.8             | 13.3  | 29.2          | 26.7                 | 6.7          | 10.0        | 12.3              | 2.3              | 12.8  |
| Hip                  | 15.3                     | 41.0               | 5.4        | 8.9        | 2.6              | 8.4             | 18.4  | 12.4          | 45.6                 | 0.0          | 9.9         | 1.8               | 10.3             | 20.0  |
| Ile                  | 16.3                     | 29.4               | 0.0        | 11.1       | 19.6             | 1.6             | 21.9  | 15.8          | 40.7                 | 0.2          | 13.2        | 15.3              | 2.1              | 12.7  |
| allo-Ile             | -                        | -                  | -          | -          | -                | -               | -     | 32.7          | 26.1                 | 0.9          | 10.9        | 16.4              | 1.3              | 11.7  |
| Leu                  | 35.9                     | 27.4               | 4.3        | 8.3        | 10.5             | 1.6             | 11.9  | 38.2          | 28.0                 | 2.1          | 8.1         | 10.7              | 1.7              | 11.2  |
| Lys                  | 32.8                     | 32.8               | 4.2        | 7.0        | 7.0              | 2.1             | 14.1  | 31.7          | 31.4                 | 3.8          | 7.9         | 8.2               | 2.7              | 14.3  |
| Met                  | 31.0                     | 27.8               | 10.2       | 7.4        | 7.9              | 2.6             | 13.0  | 31.4          | 29.5                 | 1.3          | 10.2        | 10.7              | 3.2              | 13.6  |
| Phe                  | 29.0                     | 35.5               | 1.3        | 10.3       | 9.8              | 2.8             | 11.4  | 29.8          | 35.1                 | 5.9          | 7.9         | 6.8               | 2.4              | 12.1  |
| Pro                  | 17.4                     | -                  | -          | 15.8       | 59.2             | -               | 7.6   | 4.9           | -                    | -            | 16.3        | 70.3              | -                | 8.4   |
| Ser                  | 28.3                     | 17.0               | 4.0        | 12.1       | 21.0             | 2.1             | 15.5  | 27.4          | 16.0                 | 2.2          | 12.3        | 23.8              | 2.2              | 16.0  |
| Thr                  | 41.5                     | 21.7               | 1.6        | 9.1        | 14.2             | 0.9             | 11.1  | 47.1          | 24.0                 | 0.2          | 6.8         | 10.9              | 0.6              | 10.4  |
| allo-Thr             | -                        | -                  | -          | -          | -                | -               | -     | 19.0          | 26.2                 | 0.0          | 10.9        | 24.0              | 2.0              | 17.9  |
| Trp                  | 30.7                     | 35.2               | 6.4        | 6.7        | 6.0              | 2.2             | 12.7  | 29.9          | 38.0                 | 4.9          | 7.3         | 6.3               | 1.8              | 11.8  |
| Tyr                  | 25.3                     | 32.5               | 8.7        | 9.7        | 7.8              | 2.9             | 13.2  | 31.0          | 36.6                 | 5.2          | 7.2         | 6.5               | 2.1              | 11.5  |
| Val                  | 21.7                     | 28.3               | 3.8        | 11.4       | 18.6             | 1.8             | 14.5  | 17.2          | 23.7                 | 0.2          | 15.4        | 27.1              | 1.9              | 14.5  |

**Table S5. Simulation-to-simulation variability and maximum population differences for replicate simulations of the pentapeptides.**

| Guest<br>'X'<br>Residue | Population Frequency (%) |             |                |             |                         | Population Frequency (%) |                    |            |            |                  |                 |       |      | Max.<br>$\Delta$<br>(%) |
|-------------------------|--------------------------|-------------|----------------|-------------|-------------------------|--------------------------|--------------------|------------|------------|------------------|-----------------|-------|------|-------------------------|
|                         | $Q_{\alpha}$             | $Q_{\beta}$ | $Q_{\alpha L}$ | $Q_{\circ}$ | Max.<br>$\Delta$<br>(%) | $\alpha_R$               | Near<br>$\alpha_R$ | $\alpha_L$ | nP $\beta$ | P <sub>III</sub> | P <sub>IR</sub> | other |      |                         |
| Ala-1                   | 58.50                    | 35.52       | 5.61           | 0.37        |                         | 23.59                    | 26.19              | 4.42       | 10.87      | 9.10             | 6.42            | 19.41 |      |                         |
| Ala-2                   | 59.55                    | 32.93       | 7.07           | 0.45        | 5.03                    | 23.46                    | 27.44              | 5.68       | 9.34       | 7.50             | 6.68            | 19.90 | 2.34 |                         |
| Ala-3                   | 61.18                    | 30.49       | 7.95           | 0.38        |                         | 24.99                    | 27.56              | 6.57       | 8.53       | 7.45             | 5.94            | 18.96 |      |                         |
| Arg-1                   | 65.66                    | 26.34       | 7.95           | 0.06        |                         | 28.11                    | 29.82              | 7.10       | 8.35       | 9.11             | 3.03            | 14.48 |      |                         |
| Arg-2                   | 69.37                    | 20.83       | 9.65           | 0.16        | 5.51                    | 29.66                    | 31.26              | 8.75       | 6.70       | 7.29             | 2.26            | 14.07 | 1.82 |                         |
| Asn-1                   | 79.99                    | 17.99       | 1.90           | 0.13        |                         | 40.23                    | 34.65              | 1.62       | 7.61       | 4.74             | 2.62            | 8.53  |      |                         |
| Asn-2                   | 81.76                    | 14.75       | 3.35           | 0.14        | 3.24                    | 41.35                    | 34.99              | 2.95       | 6.29       | 3.21             | 2.62            | 8.59  | 1.53 |                         |
| Asp-1                   | 76.36                    | 17.60       | 5.92           | 0.13        |                         | 30.65                    | 42.24              | 5.48       | 2.39       | 0.18             | 4.86            | 14.21 |      |                         |
| Asp-2                   | 74.59                    | 18.21       | 7.05           | 0.14        | 1.76                    | 30.91                    | 40.62              | 6.56       | 3.31       | 0.31             | 4.27            | 14.02 | 1.62 |                         |
| Cys-1                   | 67.74                    | 25.60       | 6.49           | 0.17        |                         | 28.63                    | 33.26              | 5.84       | 8.49       | 7.04             | 3.81            | 12.93 |      |                         |
| Cys-2                   | 72.12                    | 24.28       | 3.41           | 0.18        | 4.38                    | 31.10                    | 34.86              | 2.90       | 8.65       | 6.41             | 3.60            | 12.48 | 2.94 |                         |
| Gln-1                   | 59.01                    | 26.01       | 14.81          | 0.16        |                         | 26.70                    | 25.53              | 13.52      | 8.59       | 9.08             | 2.82            | 13.77 |      |                         |
| Gln-2                   | 67.66                    | 22.92       | 9.33           | 0.09        | 8.65                    | 29.29                    | 30.49              | 8.60       | 7.67       | 6.95             | 2.66            | 14.34 | 4.96 |                         |
| Glu-1                   | 62.61                    | 30.41       | 6.25           | 0.73        |                         | 31.77                    | 23.68              | 5.77       | 9.96       | 11.60            | 2.79            | 14.45 |      |                         |
| Glu-2                   | 58.44                    | 32.10       | 9.32           | 0.14        | 4.17                    | 29.88                    | 21.67              | 8.68       | 11.37      | 11.87            | 2.85            | 13.69 | 2.91 |                         |
| Gly-1                   | 43.01                    | 9.44        | 37.43          | 10.13       |                         | 16.66                    | 5.51               | 9.81       | 3.35       | 3.32             | 1.46            | 59.91 |      |                         |
| Gly-2                   | 46.30                    | 9.08        | 35.62          | 9.01        | 9.87                    | 18.19                    | 6.69               | 9.24       | 3.07       | 2.84             | 1.53            | 58.44 | 4.73 |                         |
| Gly-3                   | 36.43                    | 9.80        | 44.31          | 9.46        |                         | 13.46                    | 5.12               | 12.73      | 3.54       | 3.34             | 1.49            | 60.33 |      |                         |
| Hid-1                   | 64.91                    | 25.66       | 9.32           | 0.11        |                         | 24.62                    | 33.11              | 8.12       | 9.25       | 7.19             | 3.58            | 14.14 |      |                         |
| Hid-2                   | 61.78                    | 25.50       | 12.50          | 0.22        | 3.18                    | 23.59                    | 31.72              | 10.83      | 9.71       | 6.97             | 3.34            | 13.84 | 2.71 |                         |
| Ile-1                   | 54.85                    | 45.12       | 0.04           | 0.00        |                         | 16.28                    | 29.42              | 0.03       | 11.12      | 19.58            | 1.64            | 21.94 |      |                         |
| Ile-2                   | 50.55                    | 48.12       | 1.32           | 0.00        | 4.29                    | 18.00                    | 23.58              | 1.22       | 12.64      | 25.73            | 1.43            | 17.41 | 6.15 |                         |
| Leu-1                   | 70.67                    | 24.02       | 5.16           | 0.15        |                         | 35.94                    | 27.39              | 4.33       | 8.33       | 10.50            | 1.62            | 11.90 |      |                         |
| Leu-2                   | 73.08                    | 21.28       | 5.56           | 0.08        | 2.74                    | 36.81                    | 29.13              | 5.03       | 7.56       | 9.24             | 1.41            | 10.84 | 1.74 |                         |
| Lys-1                   | 74.14                    | 21.13       | 4.62           | 0.12        |                         | 32.79                    | 32.80              | 4.24       | 6.97       | 7.04             | 2.10            | 14.07 |      |                         |
| Lys-2                   | 68.01                    | 24.87       | 6.96           | 0.17        | 6.14                    | 30.36                    | 29.88              | 6.18       | 8.54       | 8.81             | 2.60            | 13.63 | 2.92 |                         |
| D-Ala-1                 | 14.02                    | 0.49        | 54.95          | 30.54       |                         | 22.42                    | 24.86              | 11.72      | 9.06       | 7.30             | 5.98            | 18.67 |      |                         |
| D-Ala-2                 | 11.94                    | 0.46        | 54.47          | 33.13       | 8.70                    | 22.75                    | 23.82              | 9.87       | 9.21       | 8.85             | 5.94            | 19.56 | 7.63 |                         |
| D-Ala-3                 | 5.33                     | 0.32        | 61.32          | 33.03       |                         | 24.75                    | 28.26              | 4.09       | 8.75       | 7.27             | 6.98            | 19.91 |      |                         |



**Table S6. Effect Size Analysis of the  $\phi/\psi$  distributions within defined conformational regions for the guest residues in replicate simulations.**

| Sim #1/Sim #2                | Difference between Means |        | Pooled Standard Deviations |        | Effect Size |        |
|------------------------------|--------------------------|--------|----------------------------|--------|-------------|--------|
|                              | $\phi$                   | $\psi$ | $\phi$                     | $\psi$ | $\phi$      | $\psi$ |
| Ala-1/Ala-2 $\alpha_L$       | 0.25                     | 0.62   | 11.85                      | 19.38  | 0.02        | 0.03   |
| Ala-1/Ala-2 $\alpha_R$       | 0.29                     | 0.03   | 13.06                      | 15.27  | 0.02        | 0.00   |
| Ala-1/Ala-2 $\beta$          | 0.17                     | 2.51   | 32.24                      | 27.41  | 0.01        | 0.09   |
| Ala-1/Ala-2 $n\alpha_R$      | 0.27                     | 0.05   | 19.02                      | 12.65  | 0.01        | 0.00   |
| Ala-1/Ala-2 o                | 2.61                     | 0.73   | 40.56                      | 60.42  | 0.06        | 0.01   |
| Ala-1/Ala-2 P <sub>IIL</sub> | 0.40                     | 0.17   | 14.15                      | 15.34  | 0.03        | 0.01   |
| Ala-1/Ala-2 P <sub>IR</sub>  | 0.22                     | 0.47   | 15.85                      | 13.95  | 0.01        | 0.03   |
| Ala-1/Ala-3 $\alpha_L$       | 0.14                     | 0.73   | 12.61                      | 20.60  | 0.01        | 0.04   |
| Ala-1/Ala-3 $\alpha_R$       | 0.10                     | 0.76   | 13.27                      | 15.39  | 0.01        | 0.05   |
| Ala-1/Ala-3 $\beta$          | 2.34                     | 1.15   | 31.45                      | 27.38  | 0.07        | 0.04   |
| Ala-1/Ala-3 $n\alpha_R$      | 0.22                     | 0.02   | 18.90                      | 12.64  | 0.01        | 0.00   |
| Ala-1/Ala-3 o                | 1.32                     | 3.10   | 40.71                      | 60.21  | 0.03        | 0.05   |
| Ala-1/Ala-3 P <sub>IIL</sub> | 0.57                     | 1.53   | 14.08                      | 15.23  | 0.04        | 0.10   |
| Ala-1/Ala-3 P <sub>IR</sub>  | 0.47                     | 0.18   | 15.46                      | 13.58  | 0.03        | 0.01   |
| Ala-2/Ala-3 $\alpha_L$       | 0.11                     | 0.11   | 11.62                      | 18.96  | 0.01        | 0.01   |
| Ala-2/Ala-3 $\alpha_R$       | 0.20                     | 0.73   | 13.26                      | 15.54  | 0.01        | 0.05   |
| Ala-2/Ala-3 $\beta$          | 2.17                     | 3.66   | 32.93                      | 27.97  | 0.07        | 0.13   |
| Ala-2/Ala-3 $n\alpha_R$      | 0.49                     | 0.02   | 18.77                      | 12.55  | 0.03        | 0.00   |
| Ala-2/Ala-3 o                | 1.29                     | 2.37   | 40.69                      | 58.96  | 0.03        | 0.04   |
| Ala-2/Ala-3 P <sub>IIL</sub> | 0.18                     | 1.36   | 14.70                      | 15.93  | 0.01        | 0.09   |
| Ala-2/Ala-3 P <sub>IR</sub>  | 0.25                     | 0.29   | 15.17                      | 13.37  | 0.02        | 0.02   |
| Arg-1/Arg-2 $\alpha_L$       | 0.20                     | 0.42   | 11.47                      | 18.91  | 0.02        | 0.02   |
| Arg-1/Arg-2 $\alpha_R$       | 0.23                     | 0.81   | 12.45                      | 14.88  | 0.02        | 0.05   |
| Arg-1/Arg-2 $\beta$          | 1.30                     | 2.54   | 25.96                      | 27.32  | 0.05        | 0.09   |
| Arg-1/Arg-2 $n\alpha_R$      | 0.40                     | 0.26   | 14.27                      | 12.44  | 0.03        | 0.02   |
| Arg-1/Arg-2 o                | 0.25                     | 13.83  | 37.98                      | 59.97  | 0.01        | 0.23   |
| Arg-1/Arg-2 P <sub>IIL</sub> | 0.75                     | 1.21   | 14.03                      | 14.83  | 0.05        | 0.08   |
| Arg-1/Arg-2 P <sub>IR</sub>  | 0.78                     | 0.74   | 12.31                      | 13.28  | 0.06        | 0.06   |
| Asn-1/Asn-2 $\alpha_L$       | 2.09                     | 5.87   | 13.64                      | 21.51  | 0.15        | 0.27   |
| Asn-1/Asn-2 $\alpha_R$       | 0.23                     | 0.45   | 12.71                      | 12.69  | 0.02        | 0.04   |
| Asn-1/Asn-2 $\beta$          | 0.34                     | 0.17   | 31.23                      | 18.44  | 0.01        | 0.01   |
| Asn-1/Asn-2 $n\alpha_R$      | 0.27                     | 0.29   | 17.63                      | 11.19  | 0.02        | 0.03   |
| Asn-1/Asn-2 o                | 2.80                     | 5.04   | 35.86                      | 54.94  | 0.08        | 0.09   |
| Asn-1/Asn-2 P <sub>IIL</sub> | 1.81                     | 0.85   | 13.66                      | 13.71  | 0.13        | 0.06   |
| Asn-1/Asn-2 P <sub>IR</sub>  | 0.40                     | 0.92   | 15.87                      | 13.84  | 0.02        | 0.07   |
| Asp-1/Asp-2 $\alpha_L$       | 0.00                     | 0.62   | 11.65                      | 16.64  | 0.00        | 0.04   |
| Asp-1/Asp-2 $\alpha_R$       | 0.19                     | 0.26   | 11.52                      | 12.42  | 0.02        | 0.02   |

| Sim #1/Sim #2           | Difference between Means |        | Pooled Standard Deviations |        | Effect Size |        |
|-------------------------|--------------------------|--------|----------------------------|--------|-------------|--------|
|                         | $\phi$                   | $\psi$ | $\phi$                     | $\psi$ | $\phi$      | $\psi$ |
| Asp-1/Asp-2 $\beta$     | 3.22                     | 0.49   | 30.62                      | 13.67  | 0.11        | 0.04   |
| Asp-1/Asp-2 $n\alpha_R$ | 0.38                     | 0.22   | 17.65                      | 11.23  | 0.02        | 0.02   |
| Asp-1/Asp-2 $\sigma$    | 3.11                     | 2.96   | 30.56                      | 29.77  | 0.10        | 0.10   |
| Asp-1/Asp-2 $P_{IIL}$   | 0.70                     | 0.56   | 16.71                      | 8.87   | 0.04        | 0.06   |
| Asp-1/Asp-2 $P_{IR}$    | 2.30                     | 0.80   | 15.11                      | 12.88  | 0.15        | 0.06   |
| Cys-1/Cys-2 $\alpha_L$  | 0.63                     | 7.98   | 9.83                       | 15.57  | 0.06        | 0.51   |
| Cys-1/Cys-2 $\alpha_R$  | 0.02                     | 0.32   | 12.96                      | 13.96  | 0.00        | 0.02   |
| Cys-1/Cys-2 $\beta$     | 3.19                     | 2.23   | 31.83                      | 26.50  | 0.10        | 0.08   |
| Cys-1/Cys-2 $n\alpha_R$ | 0.45                     | 0.03   | 17.70                      | 12.22  | 0.03        | 0.00   |
| Cys-1/Cys-2 $\sigma$    | 0.67                     | 6.18   | 36.22                      | 54.16  | 0.02        | 0.11   |
| Cys-1/Cys-2 $P_{IIL}$   | 0.80                     | 1.08   | 14.74                      | 15.51  | 0.05        | 0.07   |
| Cys-1/Cys-2 $P_{IR}$    | 0.64                     | 0.77   | 15.36                      | 14.02  | 0.04        | 0.05   |
| Gln-1/Gln-2 $\alpha_L$  | 0.02                     | 1.57   | 9.84                       | 16.33  | 0.00        | 0.10   |
| Gln-1/Gln-2 $\alpha_R$  | 0.28                     | 0.43   | 12.90                      | 15.21  | 0.02        | 0.03   |
| Gln-1/Gln-2 $\beta$     | 3.91                     | 3.86   | 25.67                      | 26.62  | 0.15        | 0.15   |
| Gln-1/Gln-2 $n\alpha_R$ | 0.39                     | 0.15   | 14.86                      | 12.80  | 0.03        | 0.01   |
| Gln-1/Gln-2 $\sigma$    | 2.89                     | 9.20   | 40.57                      | 61.30  | 0.07        | 0.15   |
| Gln-1/Gln-2 $P_{IIL}$   | 0.58                     | 0.54   | 13.75                      | 14.75  | 0.04        | 0.04   |
| Gln-1/Gln-2 $P_{IR}$    | 0.75                     | 0.34   | 12.40                      | 13.81  | 0.06        | 0.02   |
| Glu-1/Glu-2 $\alpha_L$  | 0.91                     | 1.89   | 12.38                      | 19.40  | 0.07        | 0.10   |
| Glu-1/Glu-2 $\alpha_R$  | 0.18                     | 0.73   | 12.25                      | 15.00  | 0.02        | 0.05   |
| Glu-1/Glu-2 $\beta$     | 0.82                     | 1.38   | 28.02                      | 28.18  | 0.03        | 0.05   |
| Glu-1/Glu-2 $n\alpha_R$ | 0.14                     | 0.25   | 13.85                      | 12.11  | 0.01        | 0.02   |
| Glu-1/Glu-2 $\sigma$    | 0.29                     | 10.30  | 38.84                      | 62.07  | 0.01        | 0.17   |
| Glu-1/Glu-2 $P_{IIL}$   | 0.81                     | 0.59   | 14.43                      | 15.74  | 0.06        | 0.04   |
| Glu-1/Glu-2 $P_{IR}$    | 0.42                     | 1.25   | 12.82                      | 14.02  | 0.03        | 0.09   |
| Gly-1/Gly-2 $\alpha_L$  | 0.07                     | 0.77   | 8.82                       | 19.18  | 0.01        | 0.04   |
| Gly-1/Gly-2 $\alpha_R$  | 0.08                     | 0.36   | 13.85                      | 15.48  | 0.01        | 0.02   |
| Gly-1/Gly-2 $\beta$     | 0.58                     | 0.33   | 36.34                      | 34.16  | 0.02        | 0.01   |
| Gly-1/Gly-2 $n\alpha_R$ | 0.21                     | 0.29   | 22.68                      | 13.59  | 0.01        | 0.02   |
| Gly-1/Gly-2 $\sigma$    | 11.55                    | 31.29  | 67.86                      | 78.80  | 0.17        | 0.40   |
| Gly-1/Gly-2 $P_{IIL}$   | 0.44                     | 0.30   | 13.64                      | 16.24  | 0.03        | 0.02   |
| Gly-1/Gly-2 $P_{IR}$    | 0.12                     | 1.03   | 17.36                      | 14.21  | 0.01        | 0.07   |
| Gly-1/Gly-3 $\alpha_L$  | 0.19                     | 0.89   | 9.66                       | 20.95  | 0.02        | 0.04   |
| Gly-1/Gly-3 $\alpha_R$  | 0.09                     | 1.05   | 12.90                      | 14.52  | 0.01        | 0.07   |
| Gly-1/Gly-3 $\beta$     | 0.38                     | 0.17   | 37.45                      | 35.22  | 0.01        | 0.00   |
| Gly-1/Gly-3 $n\alpha_R$ | 0.39                     | 0.38   | 21.18                      | 12.69  | 0.02        | 0.03   |
| *Gly-1/Gly-3 $\sigma$   | 8.52                     | 161.75 | 66.22                      | 78.82  | 0.13        | 2.05   |
| Gly-1/Gly-3 $P_{IIL}$   | 0.15                     | 0.42   | 14.06                      | 17.01  | 0.01        | 0.02   |
| Gly-1/Gly-3 $P_{IR}$    | 0.43                     | 1.75   | 17.14                      | 14.29  | 0.03        | 0.12   |

| Sim #1/Sim #2                | Difference between Means |        | Pooled Standard Deviations |        | Effect Size |        |
|------------------------------|--------------------------|--------|----------------------------|--------|-------------|--------|
|                              | $\phi$                   | $\psi$ | $\phi$                     | $\psi$ | $\phi$      | $\psi$ |
| Gly-2/Gly-3 $\alpha_L$       | 0.12                     | 0.12   | 8.40                       | 18.09  | 0.01        | 0.01   |
| Gly-2/Gly-3 $\alpha_R$       | 0.01                     | 0.70   | 14.80                      | 16.67  | 0.00        | 0.04   |
| Gly-2/Gly-3 $\beta$          | 0.95                     | 0.15   | 36.09                      | 33.70  | 0.03        | 0.00   |
| Gly-2/Gly-3 $n\alpha_R$      | 0.18                     | 0.08   | 23.21                      | 13.84  | 0.01        | 0.01   |
| *Gly-2/Gly-3 o               | 20.07                    | 130.46 | 65.81                      | 77.70  | 0.30        | 1.68   |
| Gly-2/Gly-3 P <sub>ILL</sub> | 0.30                     | 0.12   | 13.59                      | 16.35  | 0.02        | 0.01   |
| Gly-2/Gly-3 P <sub>IR</sub>  | 0.32                     | 0.71   | 16.98                      | 14.10  | 0.02        | 0.05   |
| Hid-1/Hid-2 $\alpha_L$       | 0.15                     | 1.50   | 11.47                      | 20.40  | 0.01        | 0.07   |
| Hid-1/Hid-2 $\alpha_R$       | 0.02                     | 0.45   | 11.96                      | 14.06  | 0.00        | 0.03   |
| Hid-1/Hid-2 $\beta$          | 2.26                     | 5.23   | 29.06                      | 25.56  | 0.08        | 0.20   |
| Hid-1/Hid-2 $n\alpha_R$      | 0.06                     | 0.50   | 15.71                      | 12.09  | 0.00        | 0.04   |
| Hid-1/Hid-2 o                | 1.48                     | 3.55   | 44.45                      | 61.39  | 0.03        | 0.06   |
| Hid-1/Hid-2 P <sub>ILL</sub> | 2.56                     | 4.34   | 15.00                      | 15.64  | 0.17        | 0.28   |
| Hid-1/Hid-2 P <sub>IR</sub>  | 0.40                     | 1.26   | 14.49                      | 14.00  | 0.03        | 0.09   |
| Ile-1/Ile-2 $\alpha_L$       | 24.28                    | 8.23   | 50.90                      | 65.25  | 0.48        | 0.13   |
| Ile-1/Ile-2 $\alpha_R$       | 0.57                     | 3.25   | 11.29                      | 16.01  | 0.05        | 0.20   |
| Ile-1/Ile-2 $\beta$          | 1.24                     | 4.23   | 22.48                      | 27.21  | 0.06        | 0.16   |
| Ile-1/Ile-2 $n\alpha_R$      | 1.83                     | 2.58   | 12.05                      | 12.07  | 0.15        | 0.21   |
| Ile-1/Ile-2 o                | 2.52                     | 0.97   | 22.07                      | 41.87  | 0.11        | 0.02   |
| Ile-1/Ile-2 P <sub>ILL</sub> | 0.98                     | 1.36   | 16.00                      | 14.79  | 0.06        | 0.09   |
| Ile-1/Ile-2 P <sub>IR</sub>  | 0.13                     | 0.70   | 10.43                      | 13.59  | 0.01        | 0.05   |
| Leu-1/Leu-2 $\alpha_L$       | 0.54                     | 5.55   | 11.46                      | 18.44  | 0.05        | 0.30   |
| Leu-1/Leu-2 $\alpha_R$       | 0.32                     | 0.69   | 12.67                      | 14.40  | 0.03        | 0.05   |
| Leu-1/Leu-2 $\beta$          | 1.84                     | 3.00   | 25.03                      | 25.98  | 0.07        | 0.12   |
| Leu-1/Leu-2 $n\alpha_R$      | 0.36                     | 0.36   | 14.06                      | 12.04  | 0.03        | 0.03   |
| Leu-1/Leu-2 o                | 0.87                     | 3.72   | 37.09                      | 61.02  | 0.02        | 0.06   |
| Leu-1/Leu-2 P <sub>ILL</sub> | 0.53                     | 0.95   | 14.14                      | 15.34  | 0.04        | 0.06   |
| Leu-1/Leu-2 P <sub>IR</sub>  | 0.30                     | 0.17   | 12.81                      | 13.83  | 0.02        | 0.01   |
| Lys-1/Lys-2 $\alpha_L$       | 0.07                     | 2.13   | 12.19                      | 20.01  | 0.01        | 0.11   |
| Lys-1/Lys-2 $\alpha_R$       | 0.23                     | 0.13   | 12.12                      | 14.45  | 0.02        | 0.01   |
| Lys-1/Lys-2 $\beta$          | 2.49                     | 2.17   | 28.30                      | 29.75  | 0.09        | 0.07   |
| Lys-1/Lys-2 $n\alpha_R$      | 0.54                     | 0.24   | 13.49                      | 11.88  | 0.04        | 0.02   |
| Lys-1/Lys-2 o                | 0.60                     | 4.58   | 34.38                      | 58.40  | 0.02        | 0.08   |
| Lys-1/Lys-2 P <sub>ILL</sub> | 0.69                     | 0.15   | 15.67                      | 16.64  | 0.04        | 0.01   |
| Lys-1/Lys-2 P <sub>IR</sub>  | 0.74                     | 0.89   | 13.14                      | 15.00  | 0.06        | 0.06   |

\*o pertains to anywhere on the Ramachandran plot (the “other” region) that does not fall within well-defined conformational regions. Hence, due to the large area and multimodal natures of these distributions, the effect size is misleading. As the interest is in determining the size of an

effect between the sampling of the defined conformational regions, these were excluded from defining a threshold value.

**Table S7. Effect Size Analysis of the L versus D  $\phi/\psi$  distributions within defined conformational regions of the Ramachandran plot for the pentapeptide guest residues.**

| State                  | L-amino acids |       |                    |      | D-amino acids |        |                    |      | Difference between Means |        | Pooled Standard Deviations |        | Effect Size |        |
|------------------------|---------------|-------|--------------------|------|---------------|--------|--------------------|------|--------------------------|--------|----------------------------|--------|-------------|--------|
|                        | Mean          |       | Standard Deviation |      | Mean          |        | Standard Deviation |      | $\phi$                   | $\psi$ | $\phi$                     | $\psi$ | $\phi$      | $\psi$ |
| Ala-1 $\alpha_L$       | 52.8          | 75.2  | 11.2               | 18.4 | -52.3         | -73.9  | 11.3               | 18.7 | 0.4                      | 1.2    | 11.3                       | 18.6   | 0.04        | 0.07   |
| Ala-1 $\alpha_R$       | -79.8         | -45.1 | 13.1               | 15.2 | 79.9          | 45.2   | 13.0               | 15.3 | 0.2                      | 0.2    | 13.0                       | 15.2   | 0.01        | 0.01   |
| Ala-1 $\beta$          | -117.6        | 128.3 | 33.1               | 28.8 | 113.9         | -124.8 | 33.8               | 28.2 | 3.7                      | 3.5    | 33.4                       | 28.5   | 0.11        | 0.12   |
| Ala-1 $n\alpha_R$      | -129.0        | -32.1 | 18.7               | 12.5 | 128.8         | 31.8   | 18.6               | 12.4 | 0.2                      | 0.3    | 18.7                       | 12.4   | 0.01        | 0.03   |
| Ala-1 o                | -126.5        | 1.1   | 40.1               | 60.9 | 129.9         | -5.7   | 49.2               | 62.6 | 3.4                      | 4.7    | 44.8                       | 61.8   | 0.08        | 0.08   |
| Ala-1 P <sub>III</sub> | -77.9         | 148.4 | 14.8               | 16.1 | 77.3          | -147.5 | 14.8               | 16.1 | 0.5                      | 0.8    | 14.8                       | 16.1   | 0.04        | 0.05   |
| Ala-1 P <sub>IR</sub>  | -148.7        | 72.7  | 15.8               | 13.9 | 149.1         | -72.7  | 15.7               | 13.9 | 0.4                      | 0.0    | 15.8                       | 13.9   | 0.02        | 0.00   |
| Arg-1 $\alpha_L$       | 52.5          | 77.6  | 10.9               | 18.1 | -52.2         | -77.3  | 11.1               | 17.7 | 0.3                      | 0.2    | 11.0                       | 17.9   | 0.03        | 0.01   |
| Arg-1 $\alpha_R$       | -82.2         | -45.6 | 12.2               | 14.7 | 81.9          | 45.9   | 12.3               | 14.8 | 0.3                      | 0.3    | 12.3                       | 14.7   | 0.02        | 0.02   |
| Arg-1 $\beta$          | -109.7        | 125.2 | 27.3               | 28.1 | 110.8         | -128.4 | 26.8               | 29.2 | 1.1                      | 3.2    | 27.1                       | 28.6   | 0.04        | 0.11   |
| Arg-1 $n\alpha_R$      | -120.8        | -33.0 | 13.9               | 12.3 | 120.8         | 33.4   | 13.9               | 12.2 | 0.0                      | 0.4    | 13.9                       | 12.2   | 0.00        | 0.03   |
| Arg-1 o                | -114.3        | -14.2 | 37.6               | 60.2 | 113.1         | 20.0   | 38.1               | 60.7 | 1.3                      | 5.8    | 37.8                       | 60.4   | 0.03        | 0.10   |
| Arg-1 P <sub>III</sub> | -79.5         | 148.5 | 14.9               | 15.6 | 79.9          | -149.1 | 14.8               | 15.6 | 0.5                      | 0.6    | 14.9                       | 15.6   | 0.03        | 0.04   |
| Arg-1 P <sub>IR</sub>  | -136.1        | 74.1  | 13.4               | 14.2 | 134.4         | -74.2  | 12.6               | 14.0 | 1.7                      | 0.1    | 13.0                       | 14.1   | 0.13        | 0.01   |
| Ash-1 $\alpha_L$       | 53.4          | 83.9  | 11.5               | 17.6 | -52.7         | -82.4  | 11.5               | 18.1 | 0.6                      | 1.6    | 11.5                       | 18.0   | 0.05        | 0.09   |
| Ash-1 $\alpha_R$       | -80.5         | -44.3 | 12.5               | 12.2 | 79.0          | 43.3   | 13.1               | 12.5 | 1.5                      | 1.1    | 12.8                       | 12.3   | 0.12        | 0.09   |
| Ash-1 $\beta$          | -106.7        | 109.6 | 33.6               | 13.0 | 107.3         | -111.3 | 34.5               | 13.6 | 0.6                      | 1.7    | 34.2                       | 13.4   | 0.02        | 0.13   |
| Ash-1 $n\alpha_R$      | -127.2        | -35.5 | 18.5               | 10.9 | 126.6         | 35.2   | 18.3               | 11.1 | 0.6                      | 0.3    | 18.4                       | 11.0   | 0.03        | 0.03   |
| Ash-1 o                | -129.8        | -29.2 | 37.4               | 51.2 | 125.1         | 5.2    | 52.4               | 62.9 | 4.6                      | 24.0   | 45.4                       | 57.3   | 0.10        | 0.42   |
| Ash-1 P <sub>III</sub> | -76.1         | 130.9 | 14.7               | 9.3  | 75.7          | -131.8 | 14.6               | 9.8  | 0.4                      | 0.9    | 14.6                       | 9.6    | 0.03        | 0.09   |
| Ash-1 P <sub>IR</sub>  | -146.9        | 78.9  | 15.5               | 13.6 | 147.0         | -80.5  | 16.0               | 13.5 | 0.0                      | 1.6    | 15.7                       | 13.6   | 0.00        | 0.12   |
| Asn-1 $\alpha_L$       | 50.5          | 76.2  | 11.8               | 19.4 | -53.2         | -80.6  | 11.2               | 18.3 | 2.6                      | 4.5    | 11.4                       | 18.6   | 0.23        | 0.24   |
| Asn-1 $\alpha_R$       | -80.4         | -44.9 | 12.6               | 12.7 | 80.0          | 45.5   | 12.7               | 12.4 | 0.3                      | 0.6    | 12.6                       | 12.6   | 0.03        | 0.05   |
| Asn-1 $\beta$          | -106.9        | 113.8 | 32.4               | 19.0 | 104.4         | -112.0 | 32.4               | 17.1 | 2.5                      | 1.9    | 32.4                       | 18.1   | 0.08        | 0.10   |
| Asn-1 $n\alpha_R$      | -125.0        | -35.5 | 17.5               | 11.2 | 125.9         | 35.7   | 17.8               | 11.1 | 1.0                      | 0.2    | 17.7                       | 11.2   | 0.06        | 0.01   |
| Asn-1 o                | -120.5        | -26.2 | 35.4               | 55.8 | 123.1         | 29.6   | 40.2               | 56.2 | 2.6                      | 3.4    | 37.9                       | 56.0   | 0.07        | 0.06   |
| Asn-1 P <sub>III</sub> | -76.5         | 139.0 | 14.9               | 14.6 | 77.3          | -138.2 | 14.7               | 14.5 | 0.8                      | 0.8    | 14.8                       | 14.6   | 0.05        | 0.05   |
| Asn-1 P <sub>IR</sub>  | -145.9        | 78.8  | 15.9               | 13.8 | 146.7         | -78.5  | 15.8               | 13.7 | 0.7                      | 0.3    | 15.9                       | 13.7   | 0.04        | 0.03   |
| Asp-1 $\alpha_L$       | 51.8          | 72.6  | 11.1               | 15.7 | -51.5         | -72.8  | 11.2               | 15.9 | 0.3                      | 0.1    | 11.2                       | 15.8   | 0.03        | 0.01   |
| Asp-1 $\alpha_R$       | -83.0         | -34.5 | 11.6               | 12.4 | 83.0          | 34.0   | 11.4               | 12.4 | 0.0                      | 0.5    | 11.5                       | 12.4   | 0.00        | 0.04   |
| Asp-1 $\beta$          | -98.6         | 101.4 | 29.1               | 12.3 | 94.3          | -101.0 | 27.5               | 11.8 | 4.2                      | 0.3    | 28.0                       | 12.0   | 0.15        | 0.03   |
| Asp-1 $n\alpha_R$      | -126.2        | -27.5 | 17.8               | 11.4 | 126.6         | 27.3   | 18.0               | 11.4 | 0.3                      | 0.2    | 17.9                       | 11.4   | 0.02        | 0.02   |
| Asp-1 o                | -129.1        | 17.3  | 29.8               | 29.2 | 129.0         | -23.4  | 33.4               | 30.6 | 0.2                      | 6.1    | 31.7                       | 29.9   | 0.01        | 0.20   |
| Asp-1 P <sub>III</sub> | -77.4         | 128.2 | 14.1               | 7.1  | 78.1          | -128.3 | 14.6               | 7.2  | 0.7                      | 0.0    | 14.4                       | 7.2    | 0.05        | 0.01   |
| Asp-1 P <sub>IR</sub>  | -147.5        | 70.9  | 15.4               | 13.1 | 145.7         | -71.1  | 15.5               | 13.3 | 1.8                      | 0.2    | 15.5                       | 13.2   | 0.11        | 0.01   |
| Cys-1 $\alpha_L$       | 51.9          | 70.5  | 11.3               | 18.3 | -51.9         | -73.1  | 11.1               | 18.3 | 0.0                      | 2.6    | 11.2                       | 18.3   | 0.00        | 0.14   |

| State                  | L-amino acids |                    |      |                    | D-amino acids |                    |      |                    | Difference between Means |        | Pooled Standard Deviations |        | Effect Size |        |
|------------------------|---------------|--------------------|------|--------------------|---------------|--------------------|------|--------------------|--------------------------|--------|----------------------------|--------|-------------|--------|
|                        | Mean          | Standard Deviation | Mean | Standard Deviation | Mean          | Standard Deviation | Mean | Standard Deviation | $\phi$                   | $\psi$ | $\phi$                     | $\psi$ | $\phi$      | $\psi$ |
| Cys-1 $\alpha_R$       | -80.8         | 43.9               | 12.8 | 13.8               | 81.8          | 42.9               | 12.5 | 14.9               | 1.0                      | 1.1    | 12.6                       | 14.3   | 0.08        | 0.07   |
| Cys-1 $\beta$          | -116.6        | 125.0              | 31.8 | 26.7               | 111.2         | -128.6             | 28.8 | 29.0               | 5.4                      | 3.6    | 30.2                       | 28.0   | 0.18        | 0.13   |
| Cys-1 $n\alpha_R$      | -126.1        | -33.0              | 17.3 | 12.1               | 123.2         | 31.0               | 15.6 | 12.4               | 2.9                      | 2.1    | 16.6                       | 12.2   | 0.18        | 0.17   |
| Cys-1 o                | -124.6        | -1.5               | 37.8 | 54.9               | 118.5         | -7.8               | 43.3 | 60.5               | 6.1                      | 9.3    | 40.9                       | 58.0   | 0.15        | 0.16   |
| Cys-1 P <sub>III</sub> | -78.0         | 147.6              | 15.1 | 15.8               | 79.6          | -149.2             | 14.9 | 15.8               | 1.6                      | 1.7    | 15.0                       | 15.8   | 0.11        | 0.10   |
| Cys-1 P <sub>IR</sub>  | -144.1        | 74.2               | 15.6 | 14.2               | 140.1         | -73.3              | 14.9 | 14.2               | 4.0                      | 0.9    | 15.2                       | 14.2   | 0.26        | 0.06   |
| Glh-1 $\alpha_L$       | 53.1          | 75.9               | 10.5 | 18.4               | -53.6         | -74.0              | 10.6 | 18.0               | 0.5                      | 1.9    | 10.5                       | 18.3   | 0.05        | 0.10   |
| Glh-1 $\alpha_R$       | -81.0         | -46.4              | 12.4 | 14.6               | 82.0          | 45.5               | 12.3 | 14.9               | 1.0                      | 0.9    | 12.4                       | 14.7   | 0.08        | 0.06   |
| Glh-1 $\beta$          | -107.2        | 122.7              | 26.5 | 26.5               | 113.5         | -124.9             | 27.7 | 27.5               | 6.3                      | 2.2    | 27.0                       | 26.9   | 0.23        | 0.08   |
| Glh-1 $n\alpha_R$      | -121.2        | -33.1              | 14.0 | 12.4               | 122.8         | 32.4               | 14.4 | 12.4               | 1.6                      | 0.7    | 14.2                       | 12.4   | 0.11        | 0.05   |
| Glh-1 o                | -117.3        | -8.8               | 42.2 | 60.8               | 119.0         | 11.6               | 33.2 | 55.3               | 1.7                      | 2.8    | 37.6                       | 57.9   | 0.05        | 0.05   |
| Glh-1 P <sub>III</sub> | -81.3         | 146.2              | 14.6 | 15.7               | 80.3          | -147.8             | 14.8 | 15.6               | 1.0                      | 1.7    | 14.7                       | 15.7   | 0.07        | 0.11   |
| Glh-1 P <sub>IR</sub>  | -137.3        | 73.3               | 13.1 | 14.2               | 137.0         | -73.4              | 12.8 | 14.1               | 0.2                      | 0.0    | 12.9                       | 14.2   | 0.02        | 0.00   |
| Gln-1 $\alpha_L$       | 52.6          | 73.8               | 10.8 | 18.4               | -52.4         | -75.0              | 10.8 | 17.7               | 0.2                      | 1.2    | 10.8                       | 18.2   | 0.02        | 0.07   |
| Gln-1 $\alpha_R$       | -81.1         | -45.3              | 12.6 | 15.0               | 81.4          | 45.6               | 12.5 | 14.8               | 0.4                      | 0.3    | 12.6                       | 14.9   | 0.03        | 0.02   |
| Gln-1 $\beta$          | -104.9        | 120.3              | 25.7 | 26.7               | 106.4         | -124.0             | 26.4 | 28.2               | 1.6                      | 3.7    | 26.1                       | 27.4   | 0.06        | 0.14   |
| Gln-1 $n\alpha_R$      | -121.2        | -33.1              | 14.1 | 12.3               | 120.9         | 33.0               | 13.9 | 12.2               | 0.3                      | 0.1    | 14.0                       | 12.3   | 0.02        | 0.01   |
| Gln-1 o                | -111.9        | -9.2               | 44.0 | 62.6               | 112.3         | 12.8               | 35.0 | 60.7               | 0.3                      | 3.6    | 39.8                       | 61.7   | 0.01        | 0.06   |
| Gln-1 P <sub>III</sub> | -80.0         | 147.0              | 14.5 | 15.6               | 80.0          | -148.5             | 14.6 | 15.7               | 0.0                      | 1.5    | 14.6                       | 15.7   | 0.00        | 0.10   |
| Gln-1 P <sub>IR</sub>  | -135.2        | 74.9               | 12.4 | 13.9               | 135.4         | -74.7              | 12.7 | 14.1               | 0.2                      | 0.2    | 12.6                       | 14.0   | 0.02        | 0.01   |
| Glu-1 $\alpha_L$       | 52.3          | 75.9               | 10.8 | 16.9               | -52.1         | -76.7              | 11.1 | 17.7               | 0.2                      | 0.7    | 10.9                       | 17.2   | 0.02        | 0.04   |
| Glu-1 $\alpha_R$       | -80.3         | -46.1              | 12.5 | 15.1               | 80.6          | 45.5               | 12.4 | 15.2               | 0.3                      | 0.6    | 12.4                       | 15.2   | 0.03        | 0.04   |
| Glu-1 $\beta$          | -103.3        | 121.4              | 27.9 | 27.6               | 98.9          | -118.0             | 26.0 | 26.1               | 4.4                      | 3.4    | 26.1                       | 26.8   | 0.16        | 0.13   |
| Glu-1 $n\alpha_R$      | -120.8        | -32.3              | 14.0 | 12.4               | 120.8         | 32.4               | 14.3 | 12.3               | 0.0                      | 0.1    | 14.2                       | 12.4   | 0.00        | 0.01   |
| Glu-1 o                | -108.4        | -16.7              | 41.6 | 62.6               | 108.7         | 7.2                | 33.3 | 61.1               | 0.3                      | 9.5    | 37.8                       | 61.9   | 0.01        | 0.15   |
| Glu-1 P <sub>III</sub> | -78.6         | 147.2              | 14.2 | 15.8               | 78.8          | -146.9             | 14.3 | 15.6               | 0.1                      | 0.3    | 14.3                       | 15.7   | 0.01        | 0.02   |
| Glu-1 P <sub>IR</sub>  | -134.9        | 74.0               | 12.5 | 14.0               | 135.4         | -74.4              | 13.0 | 14.1               | 0.5                      | 0.4    | 12.7                       | 14.0   | 0.04        | 0.03   |
| Hid-1 $\alpha_L$       | 53.7          | 77.0               | 10.5 | 18.6               | -52.8         | -77.9              | 11.0 | 18.1               | 0.9                      | 0.9    | 10.7                       | 18.4   | 0.08        | 0.05   |
| Hid-1 $\alpha_R$       | -82.6         | -44.5              | 12.1 | 14.4               | 80.6          | 44.6               | 12.7 | 14.7               | 2.0                      | 0.1    | 12.5                       | 14.6   | 0.16        | 0.01   |
| Hid-1 $\beta$          | -114.1        | 125.1              | 27.7 | 26.8               | 109.9         | -127.1             | 29.9 | 28.1               | 4.2                      | 2.0    | 28.9                       | 27.5   | 0.14        | 0.07   |
| Hid-1 $n\alpha_R$      | -123.7        | -32.7              | 15.9 | 12.3               | 123.2         | 32.7               | 16.3 | 12.3               | 0.5                      | 0.0    | 16.1                       | 12.3   | 0.03        | 0.00   |
| Hid-1 o                | -120.4        | -9.0               | 41.0 | 59.6               | 112.3         | 11.2               | 40.9 | 64.3               | 8.0                      | 2.2    | 41.0                       | 61.8   | 0.20        | 0.03   |
| Hid-1 P <sub>III</sub> | -82.5         | 146.7              | 15.0 | 16.2               | 78.3          | -147.8             | 14.8 | 15.7               | 4.1                      | 1.1    | 14.9                       | 15.9   | 0.28        | 0.07   |
| Hid-1 P <sub>IR</sub>  | -139.2        | 75.1               | 14.5 | 14.2               | 139.0         | -75.8              | 14.8 | 14.5               | 0.2                      | 0.7    | 14.6                       | 14.3   | 0.01        | 0.05   |
| Hie-1 $\alpha_L$       | 52.9          | 78.7               | 11.2 | 19.0               | -53.2         | -78.0              | 10.8 | 18.4               | 0.4                      | 0.7    | 10.9                       | 18.6   | 0.04        | 0.04   |
| Hie-1 $\alpha_R$       | -81.1         | -44.4              | 12.4 | 14.7               | 82.6          | 44.7               | 12.2 | 14.3               | 1.5                      | 0.4    | 12.3                       | 14.5   | 0.12        | 0.03   |
| Hie-1 $\beta$          | -111.4        | 128.0              | 30.4 | 28.1               | 110.6         | -122.0             | 30.3 | 24.8               | 0.8                      | 6.0    | 30.4                       | 26.4   | 0.03        | 0.23   |
| Hie-1 $n\alpha_R$      | -124.0        | -31.8              | 16.6 | 12.5               | 123.8         | 33.1               | 15.9 | 12.1               | 0.3                      | 1.3    | 16.3                       | 12.3   | 0.02        | 0.11   |
| Hie-1 o                | -115.2        | -13.9              | 39.3 | 60.3               | 119.5         | 9.3                | 46.9 | 62.7               | 4.2                      | 4.6    | 43.3                       | 61.5   | 0.10        | 0.08   |

| State                  | L-amino acids |       |                    |      | D-amino acids |        |                    |      | Difference between Means |        | Pooled Standard Deviations |        | Effect Size |        |
|------------------------|---------------|-------|--------------------|------|---------------|--------|--------------------|------|--------------------------|--------|----------------------------|--------|-------------|--------|
|                        | Mean          |       | Standard Deviation |      | Mean          |        | Standard Deviation |      | $\phi$                   | $\psi$ | $\phi$                     | $\psi$ | $\phi$      | $\psi$ |
| Hie-1 P <sub>III</sub> | -78.4         | 148.8 | 14.6               | 15.6 | 80.2          | -142.9 | 15.2               | 15.6 | 1.8                      | 5.9    | 14.8                       | 15.6   | 0.12        | 0.38   |
| Hie-1 P <sub>IR</sub>  | -140.6        | 75.9  | 15.5               | 14.3 | 140.7         | -75.3  | 15.5               | 14.6 | 0.0                      | 0.5    | 15.5                       | 14.5   | 0.00        | 0.04   |
| Hip-1 $\alpha_L$       | 49.3          | 78.1  | 12.5               | 17.6 | -             | -      | -                  | -    | -                        | -      | -                          | -      | -           | -      |
| Hip-1 $\alpha_R$       | -82.8         | -41.8 | 11.9               | 14.2 | 83.8          | 42.4   | 12.0               | 14.2 | 1.0                      | 0.6    | 11.9                       | 14.2   | 0.08        | 0.04   |
| Hip-1 $\beta$          | -132.5        | 131.9 | 23.5               | 25.3 | 133.1         | -130.6 | 22.4               | 25.0 | 0.6                      | 1.3    | 22.9                       | 25.2   | 0.03        | 0.05   |
| Hip-1 n $\alpha_R$     | -130.5        | -32.0 | 15.5               | 12.4 | 130.7         | 31.8   | 15.2               | 12.4 | 0.2                      | 0.2    | 15.4                       | 12.4   | 0.02        | 0.02   |
| Hip-1 o                | -134.2        | 1.1   | 30.1               | 49.3 | 134.1         | 1.0    | 18.4               | 45.5 | 0.1                      | 2.1    | 24.7                       | 47.4   | 0.00        | 0.04   |
| Hip-1 P <sub>III</sub> | -83.2         | 147.9 | 15.4               | 16.2 | 86.2          | -145.8 | 14.7               | 16.1 | 3.0                      | 2.0    | 15.1                       | 16.2   | 0.20        | 0.13   |
| Hip-1 P <sub>IR</sub>  | -143.3        | 72.7  | 12.5               | 13.9 | 142.0         | -72.8  | 12.2               | 14.0 | 1.3                      | 0.1    | 12.4                       | 14.0   | 0.10        | 0.01   |
| Leu-1 $\alpha_L$       | 52.5          | 82.6  | 11.1               | 17.9 | -53.1         | -79.4  | 11.0               | 18.1 | 0.6                      | 3.2    | 11.0                       | 18.0   | 0.06        | 0.18   |
| Leu-1 $\alpha_R$       | -80.7         | -45.9 | 12.6               | 14.4 | 80.9          | 46.3   | 12.5               | 14.2 | 0.2                      | 0.4    | 12.5                       | 14.3   | 0.02        | 0.03   |
| Leu-1 $\beta$          | -101.6        | 121.6 | 25.2               | 27.5 | 103.7         | -120.6 | 26.3               | 26.1 | 2.2                      | 1.1    | 25.8                       | 26.8   | 0.08        | 0.04   |
| Leu-1 n $\alpha_R$     | -119.2        | -34.5 | 14.0               | 11.9 | 118.9         | 34.6   | 13.9               | 11.9 | 0.2                      | 0.1    | 14.0                       | 11.9   | 0.02        | 0.01   |
| Leu-1 o                | -107.3        | -33.9 | 40.0               | 64.7 | 107.3         | 38.3   | 31.1               | 59.8 | 0.0                      | 4.4    | 36.0                       | 62.4   | 0.00        | 0.07   |
| Leu-1 P <sub>III</sub> | -80.4         | 147.2 | 14.7               | 15.9 | 80.2          | -147.2 | 14.7               | 15.7 | 0.2                      | 0.0    | 14.7                       | 15.8   | 0.01        | 0.00   |
| Leu-1 P <sub>IR</sub>  | -133.4        | 76.3  | 12.8               | 14.3 | 136.1         | -77.1  | 14.3               | 14.4 | 2.7                      | 0.8    | 13.6                       | 14.3   | 0.20        | 0.05   |
| Lys-1 $\alpha_L$       | 52.6          | 75.6  | 11.0               | 18.5 | -52.6         | -79.4  | 11.1               | 17.8 | 0.0                      | 3.8    | 11.0                       | 18.1   | 0.00        | 0.21   |
| Lys-1 $\alpha_R$       | -81.7         | -46.0 | 12.3               | 14.7 | 81.4          | 45.5   | 12.5               | 14.6 | 0.2                      | 0.5    | 12.4                       | 14.7   | 0.02        | 0.03   |
| Lys-1 $\beta$          | -110.3        | 127.1 | 26.8               | 28.5 | 107.5         | -124.6 | 26.0               | 28.3 | 2.8                      | 2.5    | 26.4                       | 28.4   | 0.10        | 0.09   |
| Lys-1 n $\alpha_R$     | -120.8        | -33.7 | 13.9               | 12.1 | 121.0         | 33.4   | 14.2               | 12.2 | 0.2                      | 0.2    | 14.0                       | 12.2   | 0.01        | 0.02   |
| Lys-1 o                | -113.2        | -28.0 | 31.2               | 56.8 | 114.1         | 20.0   | 31.7               | 58.5 | 0.9                      | 8.0    | 31.5                       | 57.6   | 0.03        | 0.14   |
| Lys-1 P <sub>III</sub> | -80.6         | 148.2 | 14.8               | 15.6 | 80.5          | -148.1 | 14.8               | 15.9 | 0.2                      | 0.1    | 14.8                       | 15.8   | 0.01        | 0.01   |
| Lys-1 P <sub>IR</sub>  | -134.1        | 73.9  | 12.3               | 14.3 | 135.0         | -74.1  | 13.2               | 14.3 | 0.9                      | 0.2    | 12.8                       | 14.3   | 0.07        | 0.02   |
| Met-1 $\alpha_L$       | 52.4          | 74.0  | 10.8               | 17.6 | -52.4         | -78.7  | 11.1               | 17.5 | 0.0                      | 4.7    | 10.8                       | 17.6   | 0.00        | 0.27   |
| Met-1 $\alpha_R$       | -81.2         | -46.2 | 12.6               | 14.7 | 82.0          | 46.1   | 12.2               | 14.6 | 0.8                      | 0.1    | 12.4                       | 14.6   | 0.07        | 0.01   |
| Met-1 $\beta$          | -104.8        | 120.9 | 25.6               | 27.1 | 108.5         | -124.7 | 26.4               | 28.1 | 3.7                      | 3.8    | 26.0                       | 27.7   | 0.14        | 0.14   |
| Met-1 n $\alpha_R$     | -120.2        | -33.5 | 14.0               | 12.2 | 120.1         | 33.6   | 13.9               | 12.1 | 0.1                      | 0.2    | 14.0                       | 12.2   | 0.01        | 0.02   |
| Met-1 o                | -112.2        | -22.3 | 38.8               | 60.3 | 112.3         | 26.0   | 27.3               | 59.0 | 0.0                      | 3.8    | 33.4                       | 59.6   | 0.00        | 0.06   |
| Met-1 P <sub>III</sub> | -80.8         | 147.2 | 14.6               | 15.9 | 81.0          | -147.9 | 14.7               | 15.7 | 0.3                      | 0.6    | 14.7                       | 15.8   | 0.02        | 0.04   |
| Met-1 P <sub>IR</sub>  | -135.1        | 74.6  | 12.9               | 14.2 | 134.7         | -74.8  | 12.9               | 14.2 | 0.4                      | 0.2    | 12.9                       | 14.2   | 0.03        | 0.01   |
| Phe-1 $\alpha_L$       | 51.5          | 75.4  | 11.7               | 18.0 | -52.6         | -78.6  | 10.5               | 17.8 | 1.1                      | 3.2    | 10.8                       | 17.9   | 0.10        | 0.18   |
| Phe-1 $\alpha_R$       | -82.3         | -43.6 | 12.2               | 13.9 | 82.8          | 43.9   | 11.9               | 13.7 | 0.5                      | 0.3    | 12.0                       | 13.8   | 0.04        | 0.02   |
| Phe-1 $\beta$          | -114.4        | 126.0 | 28.8               | 26.0 | 111.9         | -123.6 | 30.4               | 25.2 | 2.5                      | 2.4    | 29.5                       | 25.7   | 0.09        | 0.09   |
| Phe-1 n $\alpha_R$     | -123.5        | -33.0 | 16.0               | 12.0 | 122.9         | 33.2   | 15.8               | 12.0 | 0.6                      | 0.2    | 15.9                       | 12.0   | 0.04        | 0.02   |
| Phe-1 o                | -117.1        | -15.4 | 29.9               | 56.3 | 119.0         | 13.6   | 40.0               | 58.9 | 1.8                      | 1.8    | 35.4                       | 57.7   | 0.05        | 0.03   |
| Phe-1 P <sub>III</sub> | -81.0         | 146.8 | 15.0               | 15.9 | 79.6          | -144.3 | 15.0               | 15.4 | 1.4                      | 2.4    | 15.0                       | 15.7   | 0.10        | 0.16   |
| Phe-1 P <sub>IR</sub>  | -140.3        | 76.8  | 15.2               | 14.4 | 138.9         | -74.8  | 14.5               | 14.6 | 1.4                      | 2.0    | 14.9                       | 14.5   | 0.09        | 0.14   |
| Pro-1 $\alpha_R$       | -63.0         | -49.6 | 8.9                | 13.4 | 63.0          | 48.5   | 9.1                | 13.7 | 0.1                      | 1.1    | 9.0                        | 13.5   | 0.01        | 0.08   |
| Pro-1 $\beta$          | -67.2         | 113.7 | 9.0                | 19.8 | 67.2          | -114.8 | 9.1                | 21.6 | 0.0                      | 1.1    | 9.0                        | 20.7   | 0.00        | 0.05   |

| State                  | L-amino acids |       |                    |      | D-amino acids |        |                    |      | Difference between Means |        | Pooled Standard Deviations |        | Effect Size |        |
|------------------------|---------------|-------|--------------------|------|---------------|--------|--------------------|------|--------------------------|--------|----------------------------|--------|-------------|--------|
|                        | Mean          |       | Standard Deviation |      | Mean          |        | Standard Deviation |      | $\phi$                   | $\psi$ | $\phi$                     | $\psi$ | $\phi$      | $\psi$ |
| Pro-1 o                | -47.9         | 139.6 | 9.7                | 32.9 | 47.4          | -140.0 | 9.0                | 26.5 | 0.5                      | 0.4    | 9.3                        | 29.7   | 0.05        | 0.01   |
| Pro-1 P <sub>III</sub> | -65.0         | 146.0 | 8.5                | 15.2 | 65.1          | -147.1 | 8.4                | 15.1 | 0.1                      | 1.1    | 8.4                        | 15.2   | 0.01        | 0.07   |
| Ser-1 $\alpha_L$       | 51.6          | 74.6  | 11.4               | 18.1 | -52.0         | -73.9  | 11.1               | 18.3 | 0.3                      | 0.8    | 11.3                       | 18.2   | 0.03        | 0.04   |
| Ser-1 $\alpha_R$       | -79.2         | -42.7 | 13.1               | 15.3 | 79.2          | 42.3   | 13.1               | 15.6 | 0.0                      | 0.4    | 13.1                       | 15.4   | 0.00        | 0.02   |
| Ser-1 $\beta$          | -94.3         | 128.6 | 26.6               | 33.1 | 96.5          | -132.5 | 27.7               | 33.7 | 2.2                      | 3.9    | 27.1                       | 33.4   | 0.08        | 0.12   |
| Ser-1 n $\alpha_R$     | -119.4        | -30.6 | 14.3               | 12.4 | 119.4         | 30.4   | 14.4               | 12.5 | 0.0                      | 0.2    | 14.3                       | 12.5   | 0.00        | 0.01   |
| Ser-1 o                | -96.2         | 24.7  | 37.3               | 74.0 | 96.9          | -21.6  | 33.6               | 73.7 | 0.7                      | 3.1    | 35.5                       | 73.8   | 0.02        | 0.04   |
| Ser-1 P <sub>III</sub> | -75.8         | 150.9 | 14.2               | 16.2 | 75.8          | -151.3 | 14.0               | 15.9 | 0.0                      | 0.3    | 14.1                       | 16.0   | 0.00        | 0.02   |
| Ser-1 P <sub>IR</sub>  | -137.1        | 73.4  | 14.2               | 14.0 | 138.0         | -73.1  | 14.9               | 14.2 | 0.9                      | 0.4    | 14.6                       | 14.1   | 0.06        | 0.03   |
| Trp-1 $\alpha_L$       | 52.5          | 79.3  | 10.8               | 18.0 | -52.2         | -77.9  | 10.7               | 18.1 | 0.3                      | 1.3    | 10.8                       | 18.1   | 0.03        | 0.07   |
| Trp-1 $\alpha_R$       | -82.1         | -44.1 | 12.3               | 13.8 | 83.1          | 44.8   | 11.9               | 13.8 | 0.9                      | 0.7    | 12.1                       | 13.8   | 0.08        | 0.05   |
| Trp-1 $\beta$          | -113.5        | 124.9 | 29.0               | 26.4 | 113.3         | -127.9 | 28.9               | 27.4 | 0.2                      | 3.0    | 29.0                       | 26.9   | 0.01        | 0.11   |
| Trp-1 n $\alpha_R$     | -123.6        | -32.7 | 16.4               | 12.1 | 123.3         | 33.1   | 16.0               | 12.0 | 0.3                      | 0.4    | 16.2                       | 12.0   | 0.02        | 0.04   |
| Trp-1 o                | -121.1        | -9.7  | 41.1               | 58.0 | 118.6         | 26.9   | 35.0               | 56.5 | 2.5                      | 17.2   | 38.3                       | 57.3   | 0.07        | 0.30   |
| Trp-1 P <sub>III</sub> | -80.8         | 145.9 | 15.0               | 15.6 | 80.9          | -146.5 | 15.1               | 15.8 | 0.1                      | 0.6    | 15.0                       | 15.7   | 0.01        | 0.04   |
| Trp-1 P <sub>IR</sub>  | -138.0        | 74.6  | 14.5               | 14.4 | 139.0         | -75.0  | 15.0               | 14.7 | 1.1                      | 0.4    | 14.7                       | 14.5   | 0.07        | 0.03   |
| Tyr-1 $\alpha_L$       | 52.4          | 77.8  | 10.9               | 18.2 | -52.6         | -75.6  | 10.7               | 18.6 | 0.1                      | 2.1    | 10.8                       | 18.4   | 0.01        | 0.12   |
| Tyr-1 $\alpha_R$       | -82.8         | -44.1 | 12.0               | 13.9 | 82.5          | 44.1   | 12.2               | 13.6 | 0.2                      | 0.0    | 12.1                       | 13.7   | 0.02        | 0.00   |
| Tyr-1 $\beta$          | -115.0        | 124.3 | 30.0               | 25.5 | 110.8         | -122.8 | 29.4               | 25.5 | 4.2                      | 1.5    | 29.7                       | 25.5   | 0.14        | 0.06   |
| Tyr-1 n $\alpha_R$     | -124.4        | -32.6 | 16.4               | 12.2 | 123.6         | 32.9   | 16.5               | 12.1 | 0.8                      | 0.2    | 16.4                       | 12.1   | 0.05        | 0.02   |
| Tyr-1 o                | -120.8        | -4.6  | 46.8               | 61.0 | 119.6         | 20.0   | 36.9               | 56.3 | 1.2                      | 15.4   | 42.5                       | 58.9   | 0.03        | 0.26   |
| Tyr-1 P <sub>III</sub> | -80.7         | 144.9 | 15.1               | 15.7 | 79.9          | -144.5 | 14.8               | 15.7 | -0.8                     | 0.4    | 14.9                       | 15.7   | 0.05        | 0.03   |
| Tyr-1 P <sub>IR</sub>  | -141.2        | 77.0  | 15.1               | 14.3 | 138.7         | -76.7  | 14.4               | 14.3 | 2.5                      | 0.4    | 14.8                       | 14.3   | 0.17        | 0.03   |
| Val-1 $\alpha_L$       | 52.7          | 83.2  | 11.2               | 16.3 | -48.0         | -84.9  | 15.0               | 16.0 | 4.7                      | 1.7    | 11.5                       | 16.3   | 0.41        | 0.10   |
| Val-1 $\alpha_R$       | -83.6         | -43.3 | 11.4               | 14.4 | 84.1          | 41.7   | 11.1               | 15.1 | 0.6                      | 1.6    | 11.3                       | 14.7   | 0.05        | 0.11   |
| Val-1 $\beta$          | -112.4        | 141.3 | 23.3               | 28.8 | 112.0         | -141.9 | 23.1               | 28.9 | 0.4                      | 0.6    | 23.2                       | 28.9   | 0.02        | 0.02   |
| Val-1 n $\alpha_R$     | -120.1        | -28.0 | 12.6               | 13.4 | 120.1         | 27.3   | 12.7               | 13.4 | 0.0                      | 0.7    | 12.7                       | 13.4   | 0.00        | 0.05   |
| Val-1 o                | -116.2        | 8.8   | 29.2               | 49.0 | 113.6         | -11.3  | 28.5               | 51.1 | 2.6                      | 2.5    | 28.8                       | 50.0   | 0.09        | 0.05   |
| Val-1 P <sub>III</sub> | -79.4         | 152.7 | 15.0               | 14.9 | 79.9          | -153.2 | 14.9               | 14.8 | 0.4                      | 0.5    | 14.9                       | 14.9   | 0.03        | 0.03   |
| Val-1 P <sub>IR</sub>  | -132.9        | 72.7  | 11.1               | 14.6 | 131.9         | -74.8  | 10.8               | 14.9 | 0.9                      | 2.1    | 10.9                       | 14.7   | 0.09        | 0.14   |



**References**

- (1) Beck, D. A. C.; Daggett, V. *Methods* **2004**, *34*, 112–120.
- (2) Beck, D. A. C.; Alonso, D. O. V.; Daggett, V. *Proc. Natl. Acad. Sci. USA* **2008**, *105*, 12259–12264.
- (3) Beck, D. A. C.; McCully, M. E.; Alonso, D. O. V.; Daggett, V. *In lucem* molecular mechanics (*ilmm*) **2000**, University of Washington, Seattle, USA.
- (4) Levitt, M.; Hirshberg, M.; Sharon, R.; Daggett, V. *Comput. Phys. Commun.* **1995**, *91*, 215–231.
- (5) Beck, D. A. C.; Armen, R. S.; Daggett, V. *Biochemistry* **2005**, *44*, 609–616.
- (6) Levitt, M.; Miriam Hirshberg; Sharon, R.; Laidig, K. E.; Daggett, V. *J. Phys. Chem. B* **1997**, *101*, 5051–5061.
